# Supplementary material for: Introgression of Root and Water Use Efficiency Traits Enhances Water Productivity: An Evidence for Physiological Breeding in Rice (Oryza sativa L.)
Source: Rice (N Y). 2019 Mar 7;12:14. doi: 10.1186/s12284-019-0268-z (PMC6405788; doi:10.1186/s12284-019-0268-z)
Supplement: Supplementary file 2 — Table S4. Foreground genotyping of trait introgressed lines using associated markers for specific target traits. (XLSX 24 kb) [file 12284_2019_268_MOESM2_ESM.xlsx]

## Sheet: Sheet1
Additional file 2: Table S4: Foreground genotyping of trait introgressed lines using associated markers for specific target traits
Marker	IR-64	AC-39020	IET-16348	1	2	3	4	5	6	7	8	9	10	11	12	13	14	15	16	17	18	19	20	21	22	23	24	25	26	27	28	29	30	31	32	33	34	35	36	37	38	39	40	41	42	43	44	45	46
RM493	260	250	240	2	2	2	2	2	2	2	2	2	2	2	2	2	2	2	2	2	2	2	2	2	2	2	2	2	2	2	2	2	2	1	1	1	1	1	1	1	1	1	1	1	1	1	3	3	3
RM586	243	272	278	0	1	2	2	3	2	2	2	2	2	3	3	3	3	3	3	3	3	3	0	0	3	3	3	3	2	3	3	3	3	3	p2	3	3	3	3	2	3	3	3	3	3	3	3	3	2
RM149	255	264	357	1	1	1	1	2	1	2	2	2	1	2	2	2	1	2	1	1	1	2	1	1	2	1	2	1	1	2	1	1	2	1	1	1	2	1	1	1	1	1	1	1	1	1	2	1	1
RM131	217	207	223	3	2	2	2	2	2	2	2	2	2	2	2	2	2	2	2	2	2	2	2	2	2	2	2	1	2	2	2	2	2	2	2	2	2	2	2	2	2	2	2	2	2	2	1	1	2
RM80	132	143	122	3	3	H	3	3	H	H	H	1	H	H	H	H	H	0	H	1	3	3	H	3	3	H	3	1	H	1	H	3	3	3	3	0	H	H	3	H	3	H	3	3	3	H	3	3	H
RM2584	173	176	247	0	H	H	3	3	3	3	3	3	3	3	3	3	3	3	1	3	3	1	3	1	1	1	1	1	3	3	3	3	H	1	3	3	3	3	H	1	3	3	1	0	0	3	3	1	1
RM1388	245	235	215	1	0	2	2	0	2	2	2	0	3	3	3	3	3	3	2	2	3	3	3	3	3	3	3	3	0	3	0	1	1	3	1	3	3	3	1	1	3	1	3	1	1	3	3	3	1
RM262	185	185	170	3	H	1	1	1	1	1	1	1	3	1	3	1	1	1	1	1	3	1	1	3	1	0	1	3	1	0	1	1	3	1	1	3	1	1	1	1	1	1	3	1	1	3	1	1	3
RM239	194	198	219	2	2	2	2	3	2	2	0	2	2	2	2	2	2	3	2	2	1	2	2	2	2	2	2	2	2	2	2	2	2	2	2	1	2	2	1	2	2	1	2	2	1	2	2	1	2
RM3825	163	169	154	3	3	2	3	3	1	3	2	3	2	2	3	2	2	1	2	2	1	2	2	1	2	2	1	2	2	1	2	2	1	2	2	1	2	2	1	2	2	1	2	2	1	2	2	1	2
RM16	186	187	167	3	1	1	1	1	3	1	3	3	1	3	1	3	3	1	1	2	1	3	3	3	1	3	1	3	1	3	1	1	3	1	1	3	1	1	3	1	3	3	1	3	1	1	3	1	3
RM3276	158	158	169	H	1	H	1	H	3	H	H	1	H	1	H	H	H	1	H	H	H	H	1	H	H	0	H	H	H	H	H	H	H	1	1	1	1	H	H	1	H	1	H	1	H	0	1	H	H
RM247	145	139	166	1	1	1	1	1	1	0	1	0	1	1	3	1	1	1	1	1	3	3	3	0	1	1	3	3	1	3	3	1	1	3	1	0	3	1	1	2	2	1	1	1	3	1	1	3	1
RM167	167	129	146	1	1	3	1	1	1	1	1	0	3	0	1	1	3	3	3	3	1	3	3	1	1	3	3	1	1	3	3	1	1	3	3	1	3	3	2	2	3	1	2	1	1	2	3	1	1
RM4455	221	298	149	1	0	1	2	1	3	2	0	3	2	1	1	1	0	1	1	0	1	2	2	1	1	0	0	0	0	1	2	1	2	1	2	2	2	0	1	2	2	1	1	1	2	1	3	3	1
RM71	160	143	168	2	2	2	3	2	2	2	2	2	2	2	2	2	2	2	2	2	2	2	2	2	2	2	0	2	2	2	2	2	2	2	2	2	2	0	2	2	0	2	2	2	2	2	2	2	2
[truncated: 205 more columns]
