# Supplementary material for: Introgression of Root and Water Use Efficiency Traits Enhances Water Productivity: An Evidence for Physiological Breeding in Rice (Oryza sativa L.)
Source: Rice (N Y). 2019 Mar 7;12:14. doi: 10.1186/s12284-019-0268-z (PMC6405788; doi:10.1186/s12284-019-0268-z)
Supplement: Supplementary file 4 — Table S5. Genotyping of the selected TILs with SSR markers for Background genome recovery and their chromosomal positions. (XLSX 18 kb) [file 12284_2019_268_MOESM4_ESM.xlsx]

## Sheet: Marker profile of selected TILs
	Additional file 4: Table S 5 Genotyping of the selected TILs with SSR markers for Background genome recovery and their chromosomal positions
	Chromosome number	Position (cM)	IR-64	AC-39020	IET-16348	32-1-40-84-54	32-1-40-24-57	32-1-40-78-84	81-23-27-378-93	81-23-31-75-157	81-23-31-93-253
	Chromosome 1
1	RM1067	54.4	A	B	C	A	A	A	A	A	A
2	RM10748	121.3	A	B	C	A	A	A	A	A	A
3	RM10793	23.4	A	B	C	A	A	A	A	A	A
4	RM1387	139.3	A	B	C	A	A	A	A	A	A
5	RM292	50.8	A	B	C	A	A	A	A	A	A
6	RM5310	164.1	A	B	C	A	A	A	A	A	A
7	RM297	126	A	B	C	A	A	A	A	A	A
8	RM302	147	A	B	C	A	A	A	A	A	A
9	RM306	98	A	B	C	A	A	A	A	A	A
10	RM495	28	A	B	C	A	A	A	A	A	A
11	RM3412	62.5	A	B	C	A	A	A	A	A	A
12	RM3825	143.7	A	B	C	B	B	A	B	B	A
13	RM493	79.9	A	B	C	C	C	C	H	A	C
	Chromosome 2
1	RM497	150.8	A	B	C	A	A	A	A	A	A
2	RM154	4.8	A	B	C	A	A	A	A	A	A
3	RM211	14.4	A	B	C	A	A	A	A	A	A
4	RM250	170.1	A	B	C	A	A	A	A	A	A
5	RM324	66	A	B	C	A	A	A	A	A	A
6	RM475	92.5	A	B	C	A	A	A	A	A	A
7	RM561	74.1	A	B	C	A	A	A	A	A	A
8	RM3515	95.2	A	B	C	A	A	A	A	A	A
9	RM341	82.7	A	B	C	A	A	A	A	A	A
10	RM573	143.7	A	B	C	A	A	A	A	A	A
11	RM279	17.3	A	B	C	A	A	A	A	A	A
12	RM327	72.6	A	B	C	A	A	A	A	A	A
13	RM262	81.1	A	B	C	A	B	B	B	A	H
14	RM71	49.8	A	B	C	B	A	A	B	B	B
	Chromosome 3
1	RM227	156.3	A	B	C	A	A	A	A	A	A
2	RM514	216.4	A	B	C	A	A	A	A	A	A
3	RM143	207.3	A	B	C	A	A	A	A	A	A
4	RM157	78.4	A	B	C	A	A	A	A	A	A
5	RM520	191.6	A	B	C	A	A	A	A	A	A
6	RM218	67.8	A	B	C	A	A	A	A	A	A
7	RM251	79.1	A	B	C	A	A	A	A	A	A
8	RM81	77.5	A	B	C	A	A	A	A	A	A
9	RM8208	88.95	A	B	C	A	A	A	A	A	A
10	RM570	221.1	A	B	C	A	A	A	A	A	A
11	RM523	11	A	B	C	A	A	A	A	A	A
12	RM175	18.9	A	B	C	A	A	A	A	A	A
13	RM16	131.5	A	B	C	B	B	B	B	B	B
	Chromosome 4
	RM5635	64.31	A	B	C	A	A	A	A	A	A
1	RM307	0	A	B	C	A	A	A	A	A	A
2	RM3288	85.2	A	B	C	A	A	A	A	A	A
3	RM518	25.5	A	B	C	A	A	A	A	A	A
4	RM470	115.5	A	B	C	A	A	A	A	A	A
5	RM451	115.5	A	B	C	A	A	A	A	A	A
6	RM5503	100.7	A	B	C	A	A	A	A	A	A
7	RM3335	113.2	A	B	C	A	A	A	A	A	A
8	RM1153	113.2	A	B	C	A	A	A	A	A	A
9	RM1113	123.8	A	B	C	A	A	A	A	A	A
10	RM119	34.4	A	B	C	A	A	A	A	A	A
11	RM1388	77.9	A	B	C	B	A	B	A	H	A
12	RM3276	102.4	A	B	C	B	H	B	B	B	B
13	RM131	148.8	A	B	C	C	C	C	C	C	C
14	RM167	37.5	A	B	C	B	B	B	B	B	B
	Chromosome 5
1	RM26	118.8	A	B	C	A	A	A	A	A	B
2	RM7363	67.5	A	B	C	A	H	A	A	A	A
3	RM6054	95.3	A	B	C	A	A	A	A	A	A
4	RM5374	12.5	A	B	C	A	A	A	A	A	A
5	RM188	100	A	B	C	H	A	A	A	A	A
6	RM194	31.3	A	B	C	A	A	A	A	A	A
7	RM421	52	A	B	C	A	A	A	A	A	A
8	RM305	95	A	B	C	A	A	A	A	A	A
	Chromosome 6
1	RM3343	117	A	B	C	A	A	A	A	A	A
2	RM340	133.5	A	B	C	A	A	A	A	A	A
3	RM539	45.1	A	B	C	A	A	A	A	A	A
4	RM5818	144.9	A	B	C	A	A	A	A	A	A
5	RM588	7.4	A	B	C	A	A	A	A	A	A
6	RM1369	6.6	A	B	C	A	A	A	A	A	A
7	RM6857	34.3	A	B	C	A	A	A	A	A	A
8	RM564	73.1	A	B	C	A	A	A	A	A	A
9	RM1370	113.1	A	B	C	A	A	A	A	A	A
10	RM3	52.5	A	B	C	A	A	A	A	A	A
11	RM276	30.8	A	B	C	A	A	A	A	A	A
12	RM586	7.4	A	B	C	C	C	C	C	C	C
	Chromosome 7
1	RM125	24.8	A	B	C	A	A	A	A	A	A
2	RM501	30.1	A	B	C	A	A	A	A	A	A
3	RM118	96.9	A	B	C	A	A	A	A	A	A
4	RM214	34.7	A	B	C	A	A	A	A	A	A
5	RM346	78.3	A	B	C	A	A	A	A	A	H
6	RM336	61	A	B	C	A	A	A	A	A	A
7	RM7454	4.4	A	B	C	A	A	A	A	A	A
8	RM427	1.1	A	B	C	A	A	A	A	A	A
9	RM3552	98.2	A	B	C	A	A	A	A	A	A
10	RM1306	116.1	A	B	C	A	A	A	A	A	A
11	RM180	55.8	A	B	C	A	A	A	A	A	A
	Chromosome 8
1	RM210	90.3	A	B	C	A	A	A	A	A	A
2	RM1235	12.8	A	B	C	A	A	A	H	A	A
3	RM230	112.2	A	B	C	A	A	A	A	A	A
4	RM350	65.8	A	B	C	A	A	A	A	A	A
5	RM6925	3.3	A	B	C	A	A	A	A	A	A
6	RM337	1.1	A	B	C	A	A	A	A	A	A
7	RM8020	36	A	B	C	A	A	A	A	A	A
8	RM544	57	A	B	C	A	A	A	A	A	A
9	RM547	58.1	A	B	C	A	A	A	A	A	A
10	RM80	103.7	A	B	C	B	B	B	B	B	B
11	RM2584	45.8	A	B	C	A	A	A	B	B	A
12	RM149	122.1	A	B	C	C	A	C	A	C	C
	Chromosome 9
1	RM3808	79.1	A	B	C	A	A	A	A	A	A
2	RM257	66.1	A	B	C	A	A	A	A	A	A
3	RM7424	60.8	A	B	C	A	A	A	A	A	A
4	RM288	74.6	A	B	C	A	A	A	A	A	A
5	RM342	78.4	A	B	C	A	A	A	A	A	A
6	RM553	76.7	A	B	C	A	A	A	A	C	A
7	RM201	81.2	A	B	C	A	A	A	A	A	A
8	RM278	88.2	A	B	C	A	A	A	A	A	A
9	RM3769	36	A	B	C	A	A	H	A	A	A
10	RM5122	55.3	A	B	C	A	A	A	A	A	A
11	RM3164	72.1	A	B	C	A	A	A	A	A	A
	Chromosome 10
1	RM5095	0	A	B	C	A	A	A	A	A	A
2	RM4477	103.1	A	B	C	A	A	A	A	A	A
3	RM590	117.2	A	B	C	A	A	A	A	A	A
4	RM7300	58.9	A	B	C	A	A	A	A	B	A
5	RM8201	35	A	B	C	A	A	A	A	A	A
6	RM7217	62.2	A	B	C	A	A	A	H	A	A
7	RM591	54	A	B	C	A	A	A	A	A	A
8	RM3214	34.7	A	B	C	A	A	A	A	A	A
9	RM239	25.2	A	B	C	B	B	B	B	B	B
10	RM4455	21.8	A	B	C	B	B	B	B	B	H
	Chromosome 11
1	RM229	77.8	A	B	C	A	A	A	A	A	A
2	RM1240	6.5	A	B	C	A	A	A	A	A	A
3	RM4	0	A	B	C	A	A	A	A	A	A
4	RM7557	9.2	A	B	C	A	H	A	A	A	A
5	RM457	83	A	B	C	A	A	A	A	A	A
6	RM5349	79.1	A	B	C	A	A	A	A	A	A
7	RM3428	56.2	A	B	C	A	A	C	A	A	A
8	RM20	101	A	B	C	A	A	A	A	A	A
9	RM21	71.1	A	B	C	A	A	A	A	A	A
10	RM536	55.1	A	B	C	A	A	A	A	A	A
	Chromosome 12
1	RM270	91.3	A	B	C	A	A	A	A	A	A
2	RM519	62.6	A	B	C	A	A	A	A	A	A
3	RM6296	26.7	A	B	C	A	A	A	A	A	A
4	RM3472	27.6	A	B	C	A	A	A	A	A	A
5	RM17	109.1	A	B	C	A	H	A	A	A	A
6	RM101	49.5	A	B	C	A	A	A	A	A	A
7	RM491	29	A	B	C	A	A	A	A	A	A
8	RM309	73	A	B	C	A	A	B	A	A	A
9	RM511	59	A	B	C	A	A	A	A	A	A
10	RM12	146	A	B	C	A	A	A	A	A	A
11	RM247	32.3	A	B	C	A	B	A	H	A	A
139
